Retraction

## Retraction: Down-regulation of microRNA-320 suppresses cardiomyocyte apoptosis and protects against myocardial ischemia and reperfusion injury by targeting IGF-1

Chun-Li Song<sup>1</sup>, Bin Liu<sup>1</sup>, Hong-Ying Diao<sup>1</sup>, Yong-Feng Shi<sup>1</sup>, Ji-Chang Zhang<sup>1</sup>, Yang-Xue Li<sup>1</sup>, Ning Liu<sup>1</sup>, Yun-Peng Yu<sup>1</sup>, Guan Wang<sup>1</sup>, Jin-Peng Wang<sup>1</sup> and Qian Li<sup>1</sup>

<sup>1</sup>Department of Cardiology, The Second Hospital of Jilin University, Changchun 130041, P.R. China

**Published:**

**Copyright:** © 2022 Song et al. This is an open access article distributed under the terms of the [Creative Commons Attribution License](#) (CC BY 3.0), which permits unrestricted use, distribution, and reproduction in any medium, provided the original author and source are credited.

**This article has been retracted:** Due to severe disputes over the authorship of the publication, all authors have agreed to the retraction of this article from Oncotarget. The retraction was acknowledged by Dr. Huiling Li from The Second Hospital of Jilin University, Changchun, China.

Original article: Oncotarget. 2016; 7:39740–39757. <https://doi.org/10.18632/oncotarget.9240>
